# Supplementary material for: Desert Environments Facilitate Unique Evolution of Biosynthetic Potential in Streptomyces
Source: Molecules. 2021 Jan 22;26(3):588. doi: 10.3390/molecules26030588 (PMC7865587; doi:10.3390/molecules26030588)
Supplement: Supplementary file 1 [file molecules-26-00588-s001.zip › Figures S1-S11_v2.pdf]

## Supplementary information figures

# Desert Environments Facilitate Unique Evolution of Biosynthetic Potential in *Streptomyces*

Kunjukrishnan Kamalakshi Sivakala <sup>1,2,†</sup>, Gutiérrez-García Karina <sup>3,4,†</sup>, Polpass Arul Jose <sup>2,5,\*</sup>, Thangadurai Thinesh <sup>6</sup>, Rangasamy Anandham <sup>5</sup>, Barona-Gómez Francisco <sup>3</sup> and Natesan Sivakumar <sup>1,\*</sup>

<sup>1</sup> School of Biotechnology, Madurai Kamaraj University, Madurai 625021, India; sivakalaarul@gmail.com (K.K.S.); siva.biotech@mkuniversity.org (N.S.)

<sup>2</sup> Robert H. Smith Faculty of Agriculture, Food and Environment, Hebrew University of Jerusalem, Rehovot 7610001, Israel

<sup>3</sup> Evolution of Metabolic Diversity Laboratory, Unidad de Genómica Avanzada (Langebio), Cinvestav-IPN, Km 9.6 Libramiento Norte, Carretera Irapuato-León, CP 36821, Irapuato, Guanajuato, Mexico; kgutierrez@carnegiescience.edu (G.-G.K.); francisco.barona@cinvestav.mx (B.-G.F.)

<sup>4</sup> Department of Embryology, Carnegie Institution for Science, Baltimore, MD 21218, USA

<sup>5</sup> Department of Agricultural Microbiology, Agricultural College and Research Institute, Tamil Nadu Agricultural University, Madurai 625104, India; anandham@tnau.ac.in (R.A.); arulmku@gmail.com (P.A.J.)

<sup>6</sup> Department of Microbiology, School of Life Sciences, Pondicherry University, Puducherry 605014, India; thina.sathesh@gmail.com

\* Authors to whom correspondence should be addressed.

† These authors contributed equally to this work

**Figure S1**

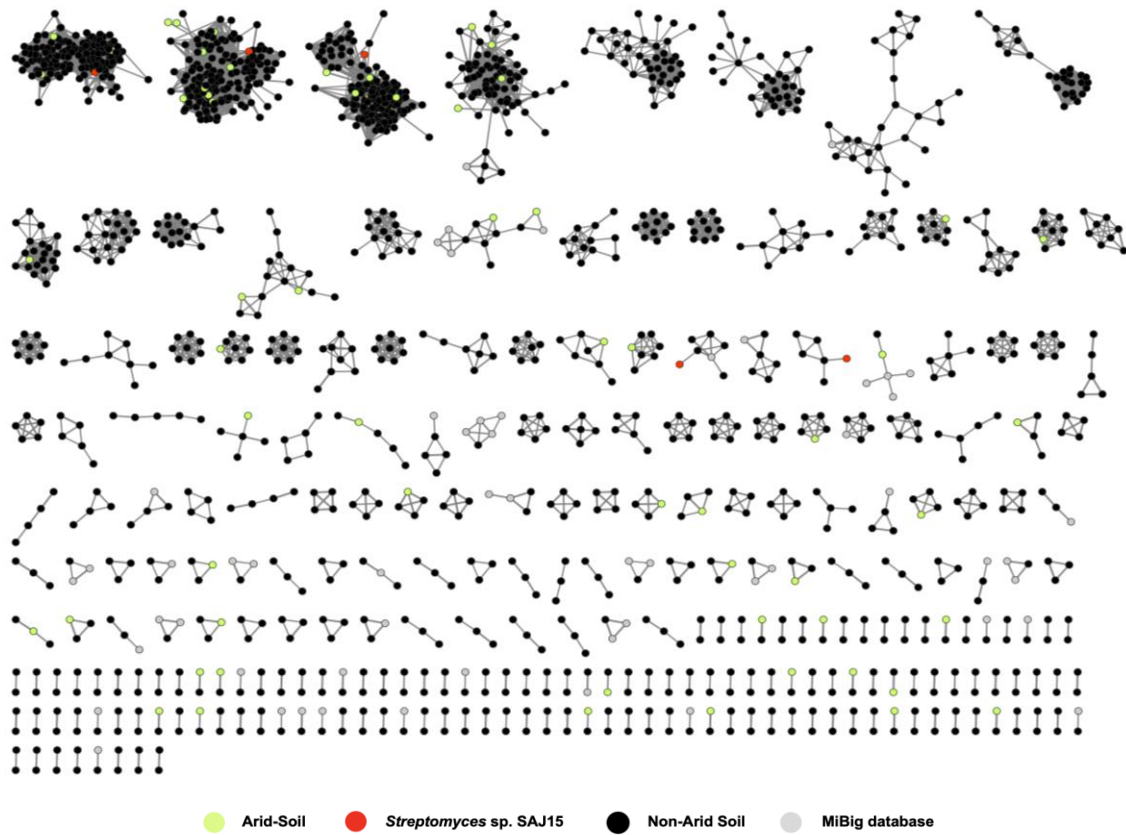

**Figure S1.** BiG-SCAPE family classified as Others. BGC sequence similarity networks of BGCs from 179 *Streptomyces* genomes. 1,540 *Streptomyces*-BGCs were classified into this GCF.

**Figure S2**

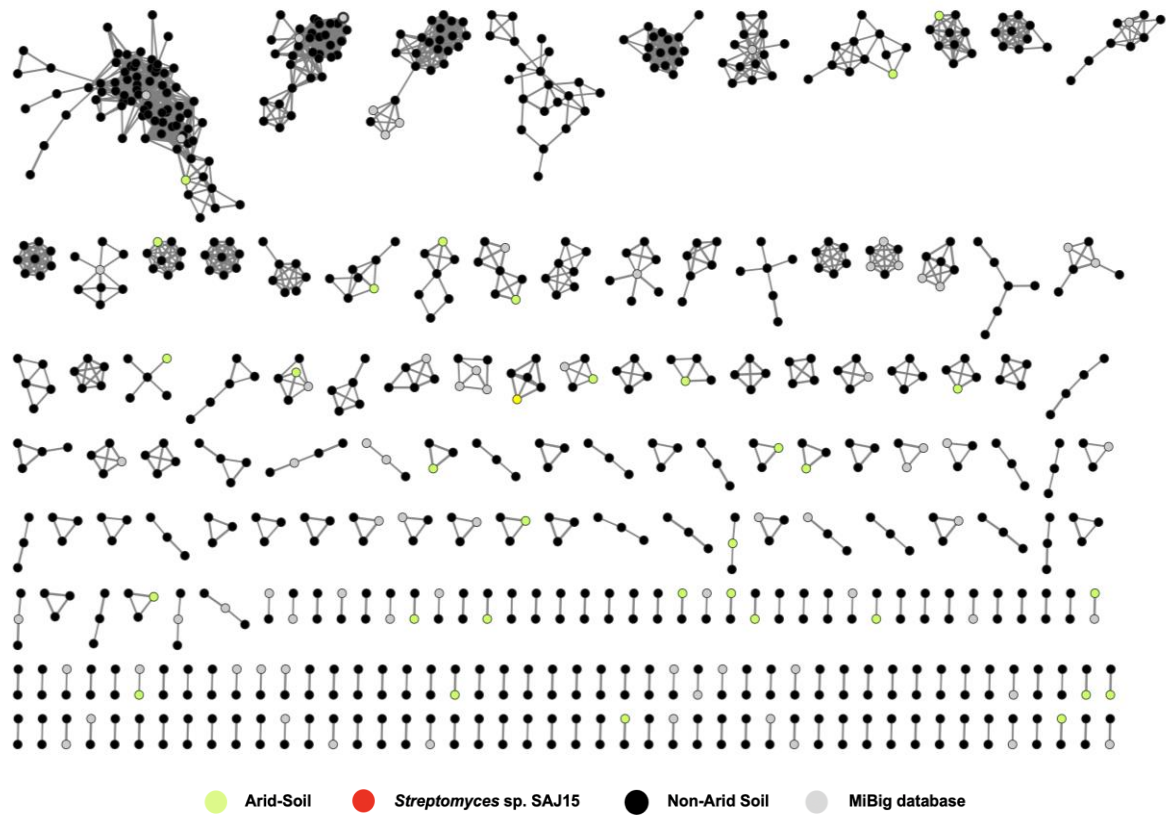

**Figure S2** BiG-SCAPE family classified as NRPs. BGC sequence similarity networks of BGCs from 179 *Streptomyces* genomes. 761 *Streptomyces*-BGCs were classified into this GCF.

**Figure S3**

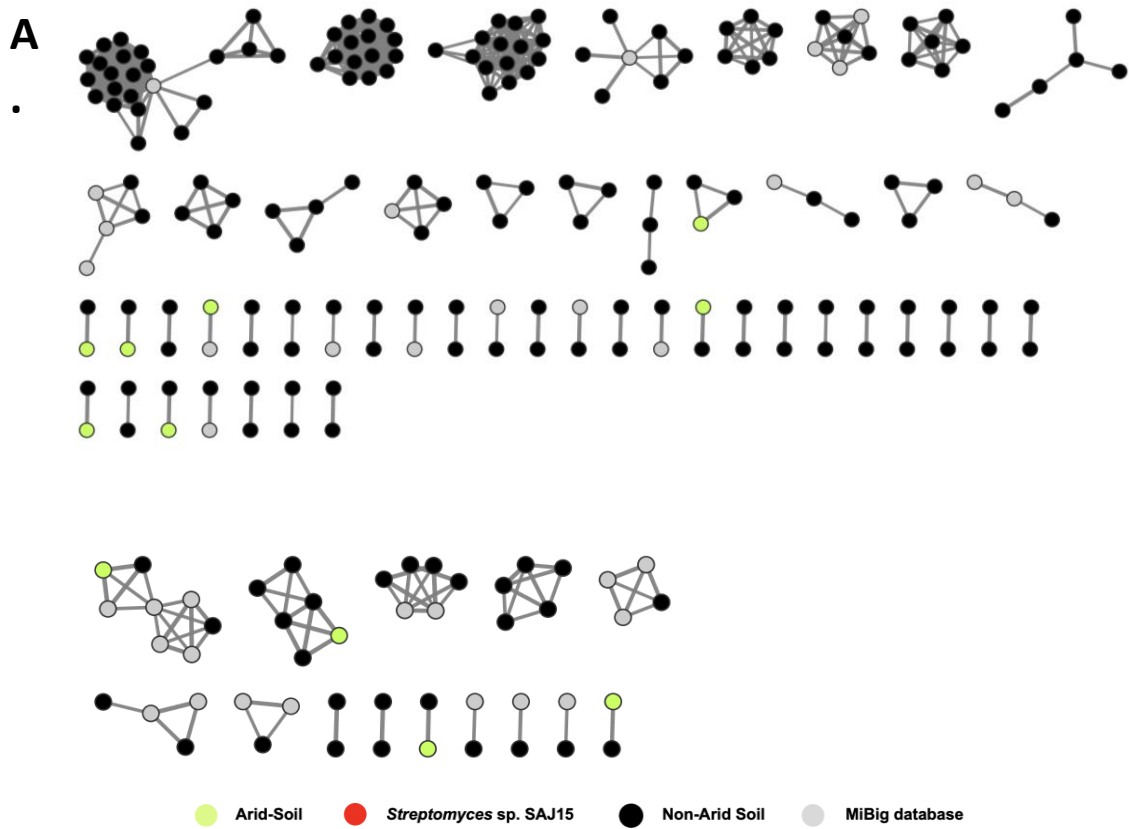

**Figure S3.** A. BiG-SCAPE family classified as PKS-NRPs hybrid. BGC sequence similarity networks of BGCs from 179 *Streptomyces* genomes. 164 *Streptomyces*-BGCs were classified into this GCF. B. BiG-SCAPE family classified as Saccharides. 33 *Streptomyces*-BGCs were classified into this GCF

**Figure S4**

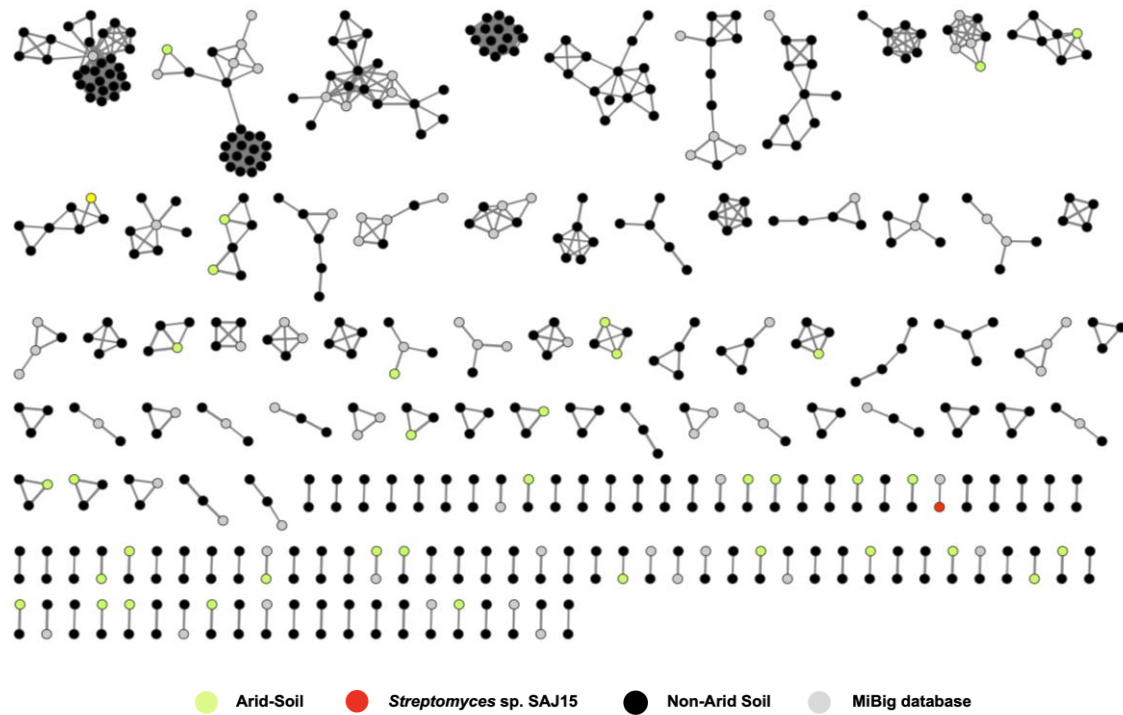

**Figure S4.** BiG-SCAPE family classified as PKS1. BGC sequence similarity networks of BGCs from 179 *Streptomyces* genomes. 457 *Streptomyces*-BGCs were classified into this GCF.

**Figure S5**

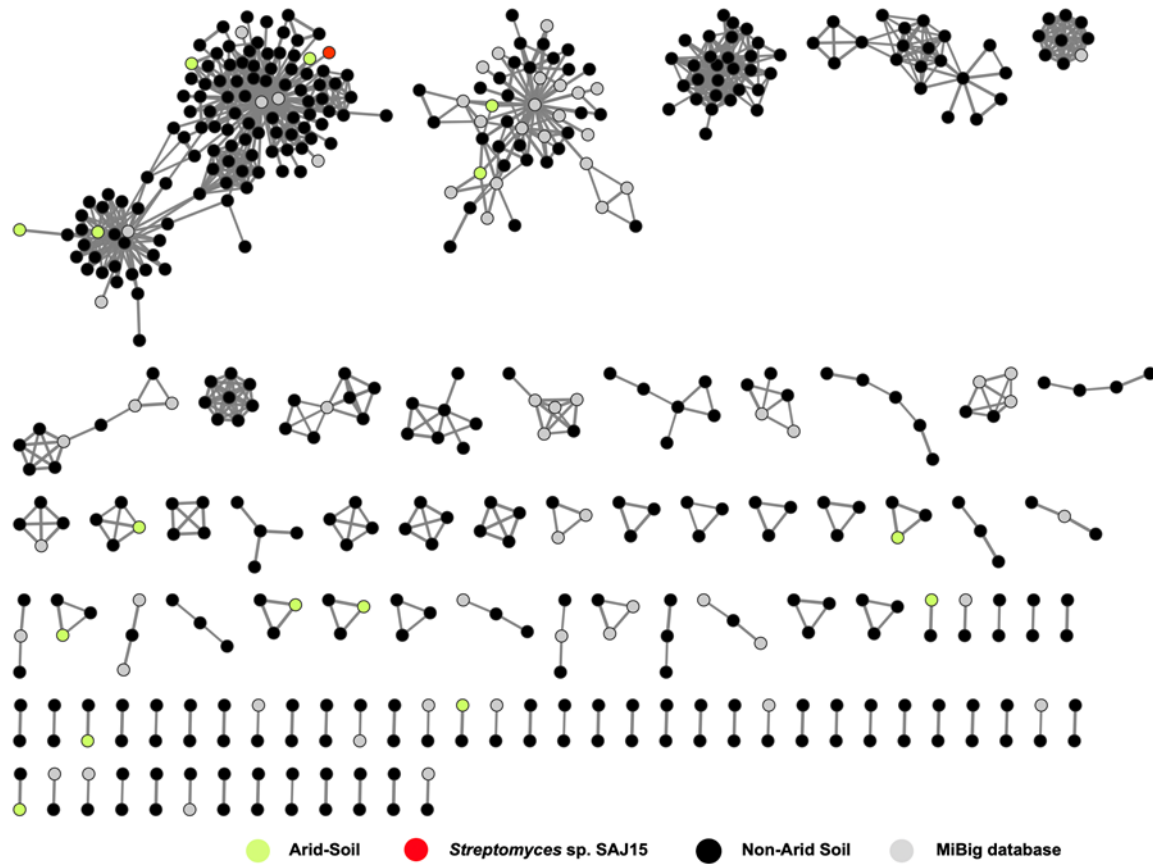

**Figure S5.** BiG-SCAPE family classified as PKS-Other. BGC sequence similarity networks of BGCs from 179 *Streptomyces* genomes. 423 *Streptomyces*-BGCs were classified into this GCF.

**Figure S6**

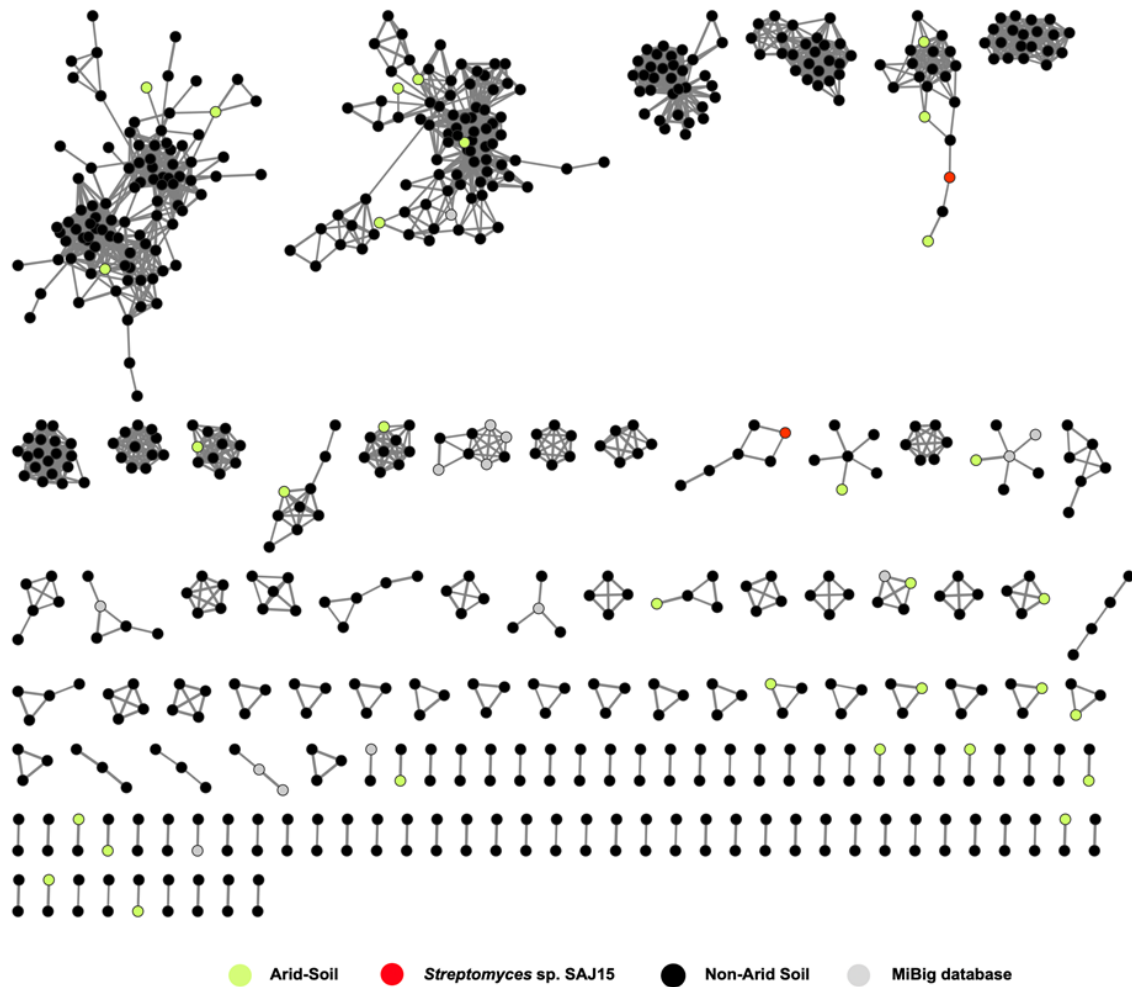

**Figure S6.** BiG-SCAPE family classified as RiPPs. BGC sequence similarity networks of BGCs from 179 *Streptomyces* genomes. 654 *Streptomyces*-BGCs were classified into this GCF.

**Figure S7**

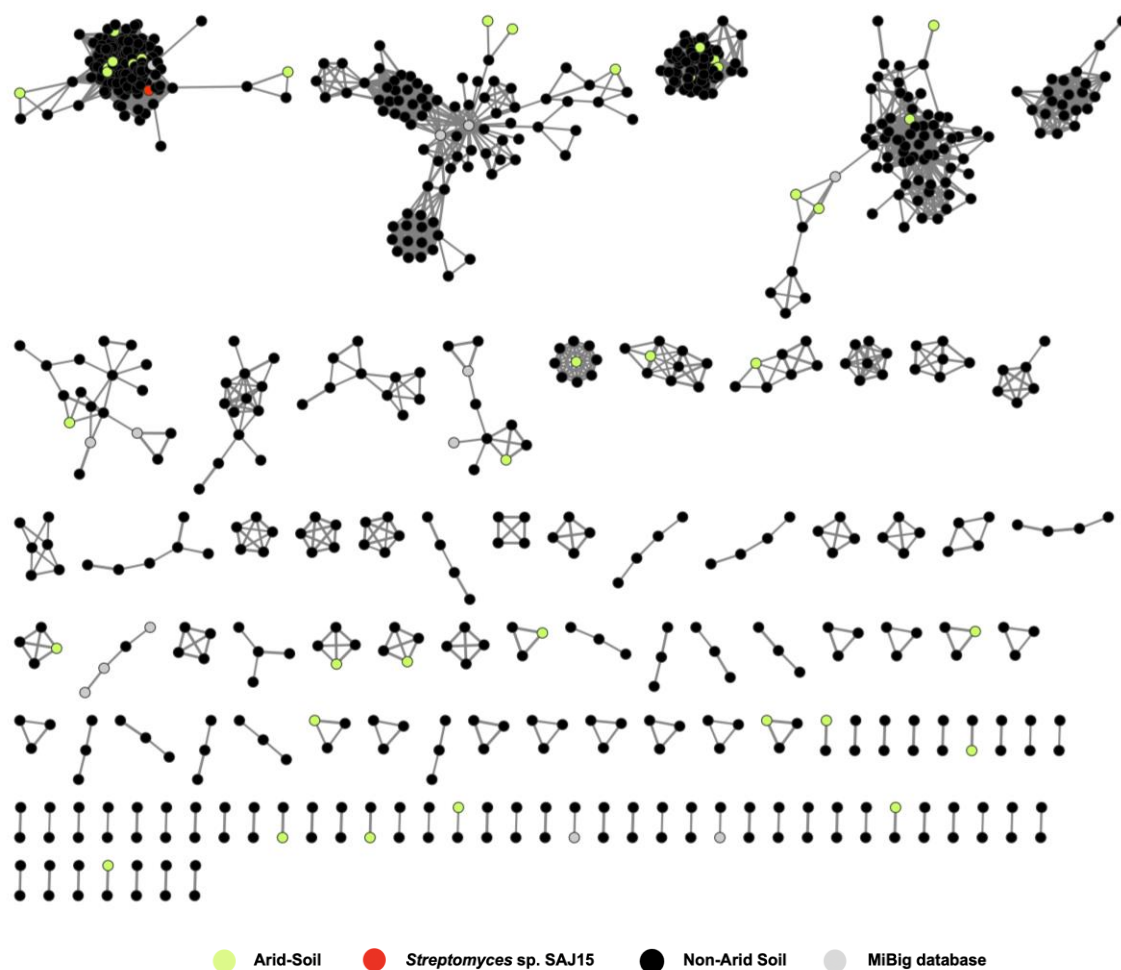

**Figure S7.** BiG-SCAPE family classified as Terpenes. BGC sequence similarity networks of BGCs from 179 *Streptomyces* genomes. 799 *Streptomyces*-BGCs were classified into this GCF.

**Figure S8**

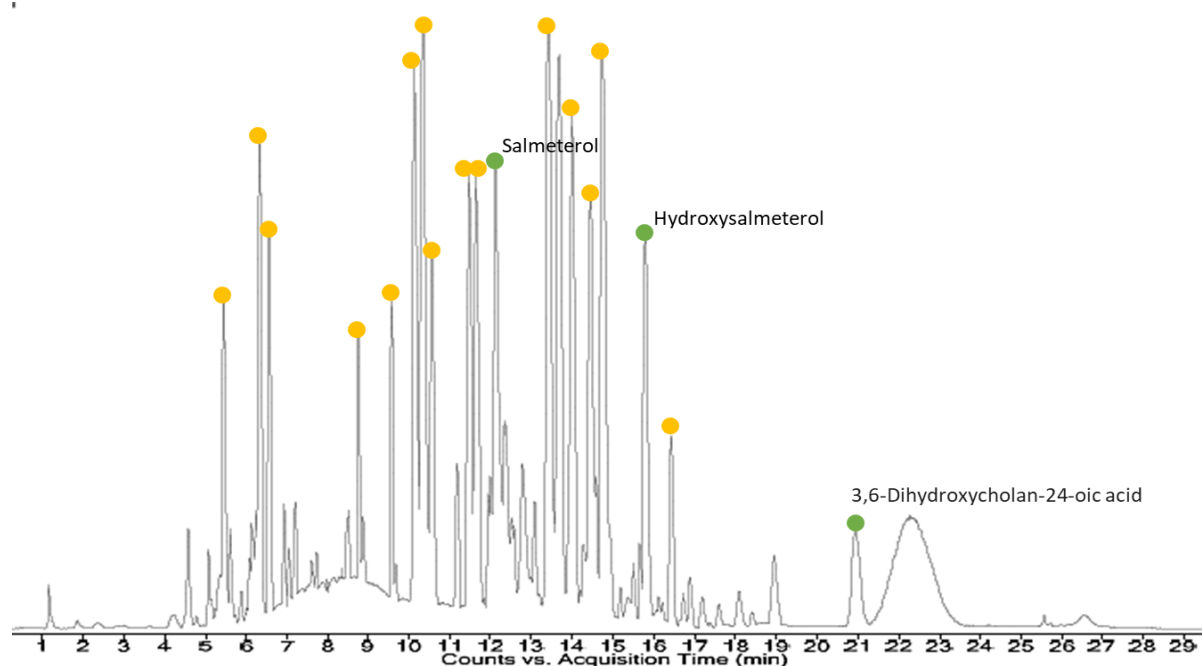

**Figure S8:** UHPLC-MS-Q-TOF chromatogram of culture extract (CE15-PM01) of *Streptomyces* sp. SAJ15. Peaks marked with green corresponds predicted to be known compounds, while yellow corresponds putatively new compounds (didn't match with mass features of known compounds).

**Figure S9**

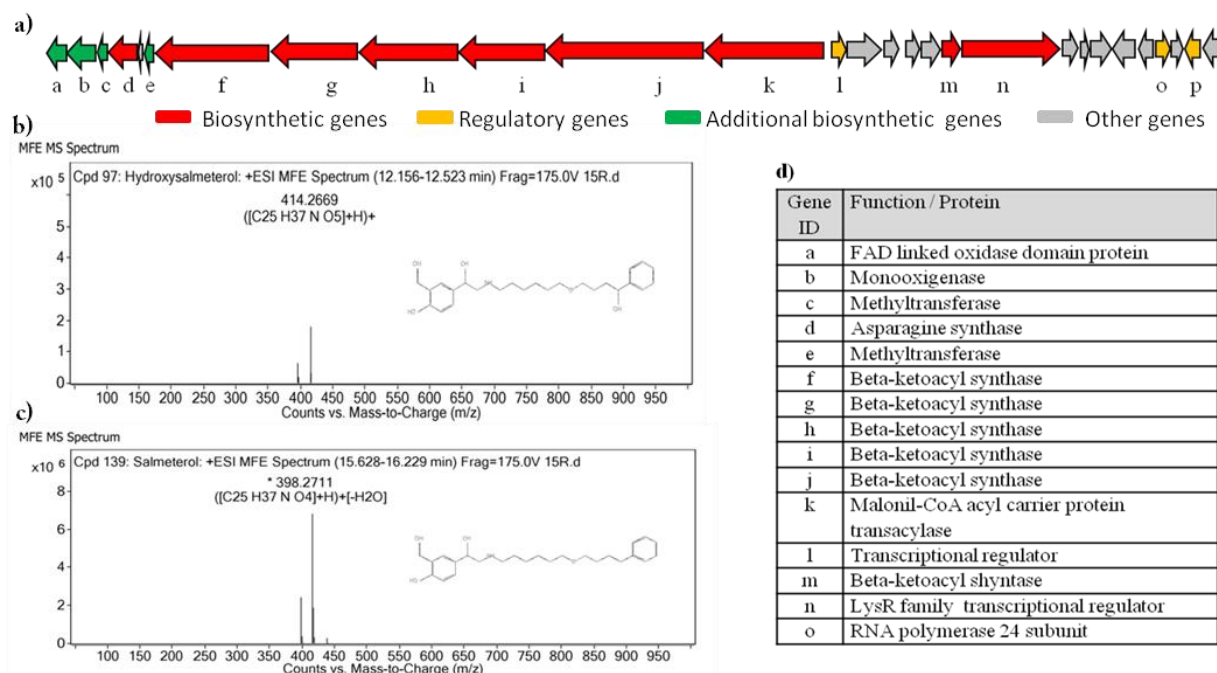

**Figure S9:** Putative relationship between the BGC14 and salmeterol derivatives detected by UHPLC-MS-Q-TOF; arrangements of genes in the identified I pks - arylpolyene BGC (a), structure of hydroxysalmeterol (b) and salmeterol (c), and identified functions/proteins of genes found in type I pks - arylpolyene BGC (d).

**Figure S10**

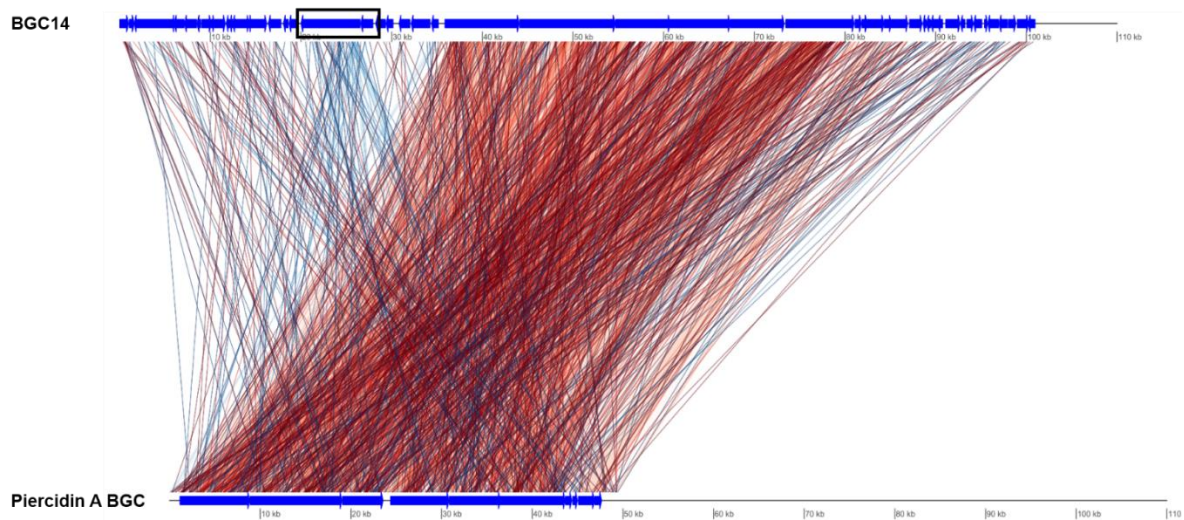

**Figure S10:** Hybrid PKs - arylpolyene BGC of SAJ15 had two additional beta-ketoacyl synthase compared to piericidin A BGC.

**Figure S11**

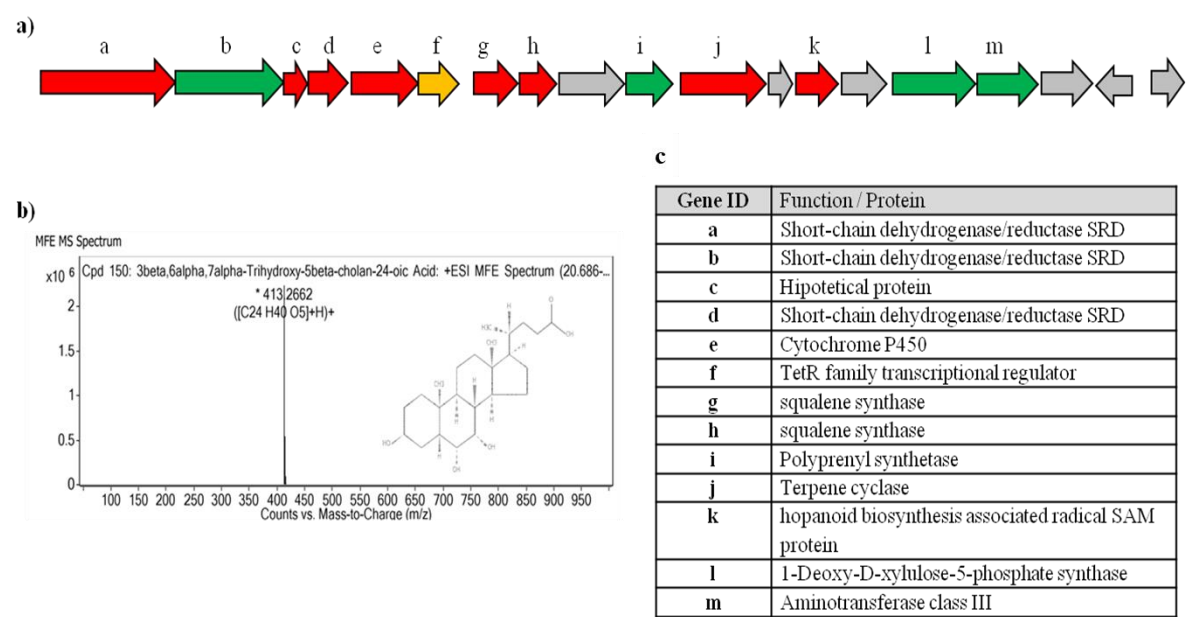

**Figure S11:** Putative relationship between the BGC\_06 and cholyglycine related compound (hydroxycholesterol-24-oic acid) detected by UHPLC-MS-Q-TOF. Arrangements of genes in the identified BGC\_06 (a), structure of 3,6-Dihydroxycholesterol-24-oic acid (b), and identified functions/proteins of genes found in BGC\_06 (c).
