# Supplementary material for: Desert Environments Facilitate Unique Evolution of Biosynthetic Potential in Streptomyces
Source: Molecules. 2021 Jan 22;26(3):588. doi: 10.3390/molecules26030588 (PMC7865587; doi:10.3390/molecules26030588)
Supplement: Supplementary file 1 [file molecules-26-00588-s001.zip › Table S1-S6.xlsx]

## Sheet: Table S1
Table S1. Streptomyces strains used to re-construct the 16S rRNA phylogenetic tree.
Strain	Strain ID	Genome assembly	NCBI Accession	Source of isolation
Streptomyces sp.	SAJ15	Yes	GCA_007595705.1	Arid soil (this study)
Streptomyces abikoensis	NBRC 13860	No	-	Garden soil
Streptomyces albiaxialis	NRRL B-24327	No	-	Oil field
Streptomyces amphotericinicus	1H-SSA8	No	-	Insect (ant)
Streptomyces angustmyceticus	NRRL B-2347 = NBRC 3934	Yes	GCA_009176265.1	Unknown
Streptomyces ascomycinicus	DSM 40822	No	-	Soil
Streptomyces caatingaensis	CMAA 1322	Yes	GCA_001187435.1	Semiarid soil
Streptomyces caniferus	NBRC 15389	Yes	GCA_009811555	Unknown
Streptomyces catenulae	NRRL B-2342	Yes	GCA_000718015.1.	Soil
Streptomyces celluloflavus	NRRL B-2493	Yes	GCA-000720995.1	Soil
Streptomyces chrestomyceticus	NBRC 13444	Yes	GCA-003865135.1	Soil
Streptomyces chumphonensis	KK1-2	No	-	Marine sediment
Streptomyces decoyicus	NRRL 2666	Yes	GCA_001270575.1	Garden soil
Streptomyces durbertensis	NEAU-S1GS20	No	-	Saline-alkali soil
Streptomyces hygroscopicus subsp. glebosus	NBRC 13786	No	-	Soil
Streptomyces hygroscopicus subsp. hygroscopicus	NBRC 13472	Yes	GCA-001553455.1	Unknown
Streptomyces jeddahensis	G25	Yes	GCA_001642995.1	Arid soil
Streptomyces kasugaensis	BCRC 12349	Yes	GCA-002261115.1	Soil
Streptomyces leeuwenhoekii	C34	Yes	GCA_001013905.1	Arid soil
Streptomyces libani subsp. libani	NBRC 13452	No	-	Arid soil?
Streptomyces libani subsp. rufus	LMG 20087	No	-	Soil
Streptomyces lichenis	LCR6-01	No	-	Lichen
Streptomyces lilacinus	NRRL B-1968	Yes	GCA-000715685.1	Soil
Streptomyces mobaraensis	NBRC 13819	Yes	GCA_000342125.1	Soil
Streptomyces monomycini	NRRL B-24309	Yes	GCA_000715845.1	Unknown
Streptomyces niger	NBRC 13362	Yes	GCA_000718305.1	Unknown
Streptomyces nigrescens	NBRC 12894	No	-	Soil
Streptomyces noursei	ATCC 11455	Yes	GCA-001704275.1	Soil
Streptomyces ochraceiscleroticus	NRRL ISP-5594	Yes	GCA-000720485.1	Soil
Streptomyces olivaceiscleroticus	DSM 40595	No	-	Soil
Streptomyces palmae	CMU-AB204	Yes	GCA_004684805.1	Rhizosphere soil
Streptomyces paromomycinus	NBRC 15454	Yes	GCA-003865155.1	Soil
Streptomyces platensis	JCM 4662	Yes	GCA_008704855.1	Soil
Streptomyces purpurogeneiscleroticus	DSM 43156	No	-	Soil
Streptomyces qinglanensis	172205	Yes	GCA-003262665.1	Mangrove soil
Streptomyces ramulosus	NRRL B-2714	No	-	Soil
Streptomyces rapamycinicus	NRRL B-5491	Yes	GCA_003675955.1	Soil
Streptomyces rimosus subsp. rimosus	ATCC 10970	Yes	GCA_008704655.1	Soil
Streptomyces rubidus	13C15	yes	GCA-900110255.1	Forest soil
Streptomyces sclerotialus	NRRL ISP-5269	Yes	GCA-000720555.1	Soil
Streptomyces sioyaensis	NRRL B-5408	No	-	Soil
Streptomyces sp.	DH-12	Yes	GCA_002899455.1	Arid soil
Streptomyces sparsus	YIM 90018	No	-	Saline-alkali soil
Streptomyces tubercidicus	DSM 40261	Yes	GCA_009811635	Soil
Streptomyces varsoviensis	NRRL ISP-5346	Yes	GCA_0008635.1	Soil
Streptomyces violens	NRRL ISP-5597	Yes	GCA_000717745.1	Soil
Streptomyces xinghaiensis	S187	Yes	GCA_000220705.2	Marine sediment
Streptomyces youssoufiensis	X4	No	-	Mine
Streptomyces zagrosensis	HM 1154	No	-	Rhizospheric soil
Streptomyces griseocarneus	DSM40004	No	-	Soil
Streptomyces rimosus subsp paromomycinus	DSM41429 = NBRC15454	Yes	GCA_003865155.1	Soil
Streptomyces sp.	SAS02	No	-	Arid soil
Streptomyces sp.	SAS09	No	-	Arid soil
Streptomyces sp.	SAS13	No	-	Arid soil
Streptomyces enissocaesilis	SAS15	No	-	Arid soil
Streptomyces sp.	Wb2n-11	Yes	GCA_001049855.1	Arid soil
Streptomyces sp.	13K301	Yes	GCA_002891435.1	Arid soil
Kitasatospora nipponensis	HKI0315	No	-	Outgroup

## Sheet: TableS2
Table S2: List of BGCs found in the genome of Streptomyces sp. SAJ15 by antiSMASH
BGC Type	BGC number	Scaffold number	Region (bp)	Most similar BGC according to antiSMASH	Homology percentage	BiG-SCAPE family	Most similar BGC according to BiG-SCAPE (MiBIG)	Singletone	Identify by HR-LC-MS
NRPS	BGC25	12	7277-68488	-	-	-	-	Yes	-
	BGC29	12	87335-131402	Skyllamycin	4	-	-	Yes	-
T1-PKS	BGC11	4	120567-301345	ECO-02301	53	-	-	Yes	-
	BGC18	6	299958-405233	Bafilomycine B	50	-	-	Yes	-
	BGC26	13	151648-197992	Tetronasin	9	-	-	Yes	-
	BGC27	13	329504-363557	Neoareothin	54	-	-	Yes	-
	BGC38**	34	1-9588	Oligomycin	38	-	-	-	-
	BGC39**	36	1-11126	Meilingmycine	6	-	-	-	-
	BGC40**	37	1-4773	-	-	-	-	-	-
	BGC41**	38	1-4669	Salinomycine	18	-	-	-	-
	BGC42**	39	1-4195	-	-	-	-	-	-
	BGC43**	43	1-27162	Chlorothricin	13	-	-	-	-
T2-PKS	BGC05	2	460375-502962	Spore pigment	83	-	-	Yes	-
	BGC34	20	46641-89270	Benastatin	75	-	-	Yes	-
	BGC35	23	1-400093	Aranciamycine	13	-	-	Yes	-
T3-PKS	BGC09	3	468160-509533	Neocarzilin	21	-	-	Yes	-
	BGC33	18	55745-96902	Meilingmycine	2	-	-	Yes	-
Hybrid Terpene:Siderophore	BGC01	1	357335-400893	Desferrioxamine	83	Other	-	-	-
Hybrid T1-PKS:NRPS	BGC12	5	32577-130885	Herbimycine	16	RiPPs	-	-	-
Hybrid NRPS:T1-PKS	BGC13	5	167969-243463	Nostophysin	18	Other	Desferrioxamine /Desferrioxamine B	-	-
Hybrid T1-PKS:Arylpolyene	BGC14	5	277916-378903	Piericidin	100	Other	Echoside / Piericidin	-	Piericidin-derivative
Hybrid T1-PKS:NRPS	BGC22	9	170985-250415	Marinopyrrole	24	-	-	Yes	-
Hybrid Arylpolyene:Ladderane	BGC30	15	174549-210492	WS9326	25	Other	-	-	-
Hybrid T1-PKS:Otherks	BGC32	17	1-42710	Sanglifehrin	4	-	-	Yes	-
Hybrid T1-PKS:Otherks	BGC37	27	1-30920	Meilingmycine	9	PKSI	Piericidin	-	-
Siderophore	BGC03	2	53938-69550	-	-	PKS-Other	Zunyimycin A/Spore pigment/Curamycin		-
	BGC21	8	272716-286535	-	-	-	-	Yes	-
	BGC23	10	35658-49098	-	-	-	-	Yes	-
Bacteriocin	BGC04	2	285734-297404	-	-	Terpene	-	-	-
	BGC28	14	117357-129276	-	-	-	-	Yes	-
Lassopeptide	BGC15**	6	12020-14704	SSV-2083	25	-	-	-	-
	BGC36	26	3751-26289	-	-	-	-	Yes	-
Lantipeptide	BGC20	8	8312-30957	Chartreusin	23	-	-	Yes	-
	BGC24	11	133064-187236	Informatipeptin	42	-	-	Yes	-
Thiopeptide	BGC16	6	99755-127797	-	-	-	-	Yes	-
Terpene	BGC06	2	597916-624761	Hopene	69	-	-	Yes	Cholyglycine-derivative
	BGC07	2	1007081-1028163	-	-	-	-	Yes	-
	BGC08	3	196692-218959	-	-	-	-	Yes	-
	BGC10	4	77372-98460	Merochlorin	4	-	-	Yes	-
	BGC17	6	178004-200097	Phenalinolactone	5	Other	-	-	-
Ladderane	BGC31	16	1-40554	Skyllamycine	10	-	-	Yes	-
Ectoine	BGC19	7	73210-83608	Ectoine	100	-	-	Yes	-
Mislaneious	BGC02	1	786500-829373	Echosides	82	RiPPs	-	-	-
**Incomplete BGCs; - No match

## Sheet: Table S3
Table S3. Streptomyces genomes used to construct the Streptomyces-BGCs dataset.
Name	Arid soil	BGCs detected by antiSMASH	Unique BGCs using MiBIG database
Kitasatospora azatica KCTC 9699 JNBY01	no	32	29
Streptacidiphilus oryzae TH49 JQMQ01	no	15	13
Streptomyces achromogenes subsp. achromogenes JODT01	no	35	7
Streptomyces acidiscabies 84-104 AHBF01	no	45	28
Streptomyces afghaniensis 772 AOPY01	no	51	26
Streptomyces albidoflavus JOII01	no	29	7
Streptomyces alboflavus JNXT01	no	38	26
Streptomyces alboviridis JNWU01	no	37	4
Streptomyces albulus CCRC 11814 AROY02	no	45	32
Streptomyces albus J1074 ABYC01	no	34	8
Streptomyces albus J1074 NC_020990.1	no	22	0
Streptomyces ambofaciens ATCC 23877 NZ_CP012382.1	no	26	4
Streptomyces angustmyceticus NRRL B-2347	no	49	30
Streptomyces anulatus JOEZ01	no	34	13
Streptomyces atratus JQJU01	no	13	7
Streptomyces atroolivaceus JNXG01	no	34	13
Streptomyces aurantiacus JA 4570 AOPZ01	no	50	32
Streptomyces auratus AGR0001 AJGV01	no	41	25
Streptomyces aureocirculatus JOAR01	no	41	28
Streptomyces aureofaciens NRRL B-1286 JNWR01	no	52	16
Streptomyces aureofaciens NRRL B-2183 JODU01	no	29	7
Streptomyces aureofaciens NRRL B-2657JOER01	no	47	6
Streptomyces aureus JNZD01	no	28	11
Streptomyces avellaneus JOFK01	no	37	1
Streptomyces avermitilis MA-4680 = NBRC 14893 BAVY01	no	46	9
Streptomyces avermitilis MA-4680 = NBRC 14893 NC_003155.4	no	37	1
Streptomyces avicenniae JOEK01f	no	17	13
Streptomyces baarnensis JNZV01	no	41	13
Streptomyces bicolor JOFS01	no	22	14
Streptomyces bikiniensis NRRL B-1049 JNWL01	no	29	2
Streptomyces bikiniensis NRRL ISP-5582 JOAU01	no	28	1
Streptomyces bingchenggensis BCW-1 NC_016582.1	no	48	34
Streptomyces bottropensis ATCC 25435 ARTP01	no	29	6
Streptomyces brasiliensis JNXB01	no	30	0
Streptomyces caatingaensis CMAA 1322 LFXA01	no	39	30
Streptomyces californicus JOFG01	no	30	0
Streptomyces caniferus NBRC 15389	no	40	16
Streptomyces canus 299MFChir4.1 ARTQ01	no	30	11
Streptomyces capuensis JNWP01	no	47	4
Streptomyces carneus JNZF01	no	26	26
Streptomyces catenulae JODY01	no	35	21
Streptomyces cattleya NRRL 8057 = DSM 46488 NC_017586.1	no	24	19
Streptomyces celluloflavus NRRL B-2493	no	42	10
Streptomyces cellulosae JOEV01	no	27	11
Streptomyces chartreusis NRRL 12338 AGDE01	no	31	7
Streptomyces chrestomyceticus NBRC 13444	no	41	4
Streptomyces clavuligerus ATCC 27064 ADGD01	no	53	24
Streptomyces clavuligerus ATCC 27064 NZ_CM000913.1	no	25	0
Streptomyces coelicoflavus ZG0656 AHGS01	no	32	16
Streptomyces coelicolor A3(2) NC_003888.3	no	27	0
Streptomyces collinus Tu 365 NC_021985.1	no	32	6
Streptomyces cyaneofuscatus JOEM01	no	30	9
Streptomyces cyaneogriseus subsp. Noncyanogenus NMWT NZ_CP010849.1	no	33	6
Streptomyces davawensis strain JCM 4913 NC_020504.1	no	32	13
Streptomyces decoyicus NRRL 2666	no	38	13
Streptomyces durhamensis JNXR01	no	40	20
Streptomyces erythrochromogenes JNZG01	no	25	7
Streptomyces exfoliatus JNZP01	no	31	9
Streptomyces flaveolus JNWV01	no	40	3
Streptomyces flaveus JOCU01	no	37	29
Streptomyces flavidovirens DSM 40150 AUBE01	no	22	11
Streptomyces flavochromogenes JNZO01	no	32	13
Streptomyces flavotricini JNXV01	no	38	23
Streptomyces flavovirens JOAB01	no	29	0
Streptomyces floridae JOAC01	no	30	1
Streptomyces fradiae JNAD01	no	25	20
Streptomyces fradieae CC53 LAB	no	25	13
Streptomyces fulvissimus DSM 40593 NC_021177.1	no	33	2
Streptomyces fulvoviolaceus JOEY01	no	31	9
Streptomyces fulvoviridis JNXH01	no	29	26
Streptomyces galbus JRHJ01	no	36	14
Streptomyces gancidicus BKS 13-15 AOHP01	no	23	10
Streptomyces ghanaensis ATCC 14672 ABYA01	no	34	12
Streptomyces glaucescens GLA.O NZ_CP009438.1	no	24	10
Streptomyces globisporus C-1027 AJUO01	no	34	4
Streptomyces globisporus subsp. globisporus JNZK01	no	31	5
Streptomyces griseoaurantiacus M045 AEYX01	no	24	15
Streptomyces griseoflavus Tu4000 ACFA01	no	34	20
Streptomyces griseofuscus JOFU01	no	54	32
Streptomyces griseolus JOFC01	no	25	0
Streptomyces griseoluteus JOBE01	no	34	10
Streptomyces griseorubens JJMG01	no	21	7
Streptomyces griseus subsp. griseus JOGA01	no	32	8
Streptomyces griseus subsp. griseus JOIT01	no	32	0
Streptomyces griseus subsp. griseus NBRC 13350 NC_010572.1	no	36	1
Streptomyces griseus subsp. rhodochrous JOFE01	no	30	0
Streptomyces griseus XylebKG-1 ADFC02	no	37	3
Streptomyces halstedii JOAZ01	no	27	0
Streptomyces himastatinicus ATCC 53653 ACEX01	no	65	45
Streptomyces hygroscopicus subsp. hygroscopicus JOIK01	no	62	34
Streptomyces hygroscopicus subsp. jinggangensis 5008 NC_017765.1	no	38	15
Streptomyces iakyrus JNXI01	no	27	10
Streptomyces incarnatus NRRL 8089 CP011497.1	no	28	11
Streptomyces ipomoeae 91-03 AEJC01	no	52	2
Streptomyces jeddahensis G25(2015) LOHS01	yes	20	12
Streptomyces kasugaensis BCRC 12349	no	34	3
Streptomyces katrae JNZY01	no	34	25
Streptomyces lavendulae subsp. lavendulae JOBU01	no	32	1
Streptomyces lavenduligriseus JOBD01	no	43	17
Streptomyces leeuwenhoekii AZSD01	no	36	0
Streptomyces leeuwenhoekii C34 NZ_LN831790.1	no	30	1
Streptomyces leeuwenhoekii C34(2013) AZSD01	yes	36	0
Streptomyces lilacinus JNXU01	no	47	1
Streptomyces lilacinus NRRL B-1968	yes	57	8
Streptomyces lividans 1326 APVM01	no	28	2
Streptomyces lividans TK24 NZ_CP009124.1	no	27	2
Streptomyces lydicus A02 NZ_CP007699.1	no	34	21
Streptomyces lydicus NRRL ISP-5461 JNZA01	no	31	19
Streptomyces mediolani JOJK01	no	30	4
Streptomyces megasporus JODL01	no	18	11
Streptomyces mirabilis JQLE01	no	32	17
Streptomyces mobaraensis NBRC 13819 = DSM 40847 AORZ01	yes	56	46
Streptomyces monomycini JNYL01	no	58	26
Streptomyces mutabilis JNFQ01	no	28	11
Streptomyces natalensis JNYF01	no	47	38
Streptomyces niger JOFQ01	no	37	24
Streptomyces niveus NCIMB 11891 AWQW01	no	33	1
Streptomyces niveus NCIMB 11891 NZ_CM002280.1	no	28	0
Streptomyces nodosus ATCC 14899 NZ_CP009313.1	no	20	8
Streptomyces noursei ATCC 11455	no	38	19
Streptomyces novaecaesareae JNWQ01	no	37	11
Streptomyces ochraceiscleroticus JOAX01	no	37	13
Streptomyces olindensis JJOH01	no	32	13
Streptomyces olivaceus JNWM01	no	28	10
Streptomyces olivaceus JOFH01	no	52	0
Streptomyces palmae JCM 31289 SRID01	no	71	62
Streptomyces paromomycinus NBRC 15454	no	43	13
Streptomyces peruviensis JOAT01	no	51	34
Streptomyces peucetius JOCK01	no	48	5
Streptomyces phaeofaciens CC34 LAB	no	31	13
Streptomyces platensis JCM 4662	no	35	15
Streptomyces pluripotens JTDH01	no	32	17
Streptomyces pratensis ATCC 33331 NC_016114.1	no	27	0
Streptomyces pristinaespiralis ATCC 25486 NZ_CM000950.1	no	19	11
Streptomyces prunicolor NBRC 13075 BARF01	no	30	0
Streptomyces puniceus JOFA01	no	31	1
Streptomyces purpeochromogenes JOBG01	no	31	0
Streptomyces purpeofuscus JODS01	no	43	31
Streptomyces purpureus KA281 ARAD01	no	27	14
Streptomyces pyridomyceticus JOAY01	no	22	0
Streptomyces rapamycinicus NRRL 5491 CP006567.1	no	52	26
Streptomyces resistomycificus JOBA01	no	32	19
Streptomyces rimosus JMGX01	no	34	2
Streptomyces rimosus R6-500 JJNO01	no	48	9
Streptomyces rimosus subsp. paromomycinus NBRC 15454 BHZD01	yes	43	12
Streptomyces rimosus subsp. rimosus ATCC 10970	no	44	12
Streptomyces rochei CC48 LAB	no	36	6
Streptomyces rochei CC71 LAB	no	33	5
Streptomyces roseochromogenes subsp. oscitans DS 12.976 NZ_CM002285.1	no	40	23
Streptomyces roseosporus Nrrl 11379 ABYX02	no	27	3
Streptomyces roseoverticillatus JOFL01	no	41	33
Streptomyces rubidus 13C15	no	23	19
Streptomyces scabiei NCPPB 4066 JPPW01	no	39	15
Streptomyces scabrisporus DSM 41855 ARCJ01	no	47	44
Streptomyces sclerotialus JODX01	no	21	11
Streptomyces scopuliridis RB72 JOEI01	no	40	29
Streptomyces seoulensis JNXP01	no	25	13
Streptomyces somaliensis DSM 40738 AJJM01	no	24	17
Streptomyces sp. 13K301 13K301 POUC01	yes	30	16
Streptomyces sp. DH-12 DH-12 PPFB01	yes	19	8
Streptomyces sp. SAJ15	yes	36	26
Streptomyces sp. Wb2n-11 Wb2n-11 CVPB01	yes	35	19
Streptomyces sulphureus DSM 40104 ARLC01	no	26	20
Streptomyces sviceus ATCC 29083 ABJJ02	no	29	6
Streptomyces sviceus ATCC 29083 NZ_CM000951.1	no	22	0
Streptomyces thermolilacinus SPC6 ASHX01	no	17	9
Streptomyces toyocaensis JFCB01	no	27	11
Streptomyces tsukubaensis NRRL18488 AJSZ01	no	61	47
Streptomyces tubercidicus DSM 40261	no	29	9
Streptomyces turgidiscabies Car8 AEJB01	no	36	16
Streptomyces varsoviensis NRRL ISP-5346 JOBF01	yes	32	24
Streptomyces venezuelae ATCC 10712 NC_018750.1	no	30	13
Streptomyces vietnamensis GIM4.0001 NZ_CP010407.1	no	30	13
Streptomyces vinaceus JNYP01	no	31	0
Streptomyces violaceoruber JOCE01	no	29	5
Streptomyces violaceorubidus JODM01	no	29	12
Streptomyces violaceusniger Tu 4113 NC_015957.1	no	41	16
Streptomyces violens JOBH01	no	28	5
Streptomyces virginiae JOAK01	no	32	1
Streptomyces viridochromogenes DSM 40736 ACEZ01	no	39	17
Streptomyces viridochromogenes Tue57 AMLP01	no	40	25
Streptomyces viridosporus T7A AJFD01	no	39	14
Streptomyces vitaminophilus DSM 41686 ARCK01	no	22	17
Streptomyces wadayamensis JHDU01	no	29	9
Streptomyces wedmorensis JNWK01	no	34	17
Streptomyces xanthophaeus JNZH01	no	34	27
Streptomyces xiamenensis 318 NZ_CP009922.2	no	20	13
Streptomyces xinghaiensis S187	no	21	8
Streptomyces xylophagus JNWO01	no	35	13
Streptomyces yeochonensis CN732 JQNR01	no	22	18
Streptomyces yerevanensis JNWJ01	no	28	16
Streptomyces zinciresistens K42 AGBF01	no	28	15

## Sheet: Table S4
Table S4: Growth (biomass) and secondary metabolites (crude extract) of strain SAJ15 cultivated in different production media
Production Media	Biomass (g/L) ± STDEV	Crude extract (mg/L) ± STDEV
PM01	7.48 ± 0.45	92.25 ± 2.8
PM02	6.09 ± 0.19	73.32 ± 1.36
PM03	7.34 ± 0.13	72.18 ± 2.08
PM04	6.47 ± 0.38	80.57 ± 3.78
PM05	4.30 ± 0.61	31.92 ± 3.74

## Sheet: Table S5
Table S5: RT and mass features of putatively novel hits that are dissimilar to known natural compounds
S. Nos.	RT	Exact Mass	Adduct ions and their mass
1	5.62	214.106	(M+H)+ = 215.112
2	6.41	151.038	(M+H)+ = 152.0418
3	6.63	245.128	(M+H)+ = 246.1311; (M+Na)+ = 267.1119
4	9.683	238.108	(M+H)+ = 239.1118
5	10.13	489.311	(M+H)+ = 490.3184; (M+Na)+ = 512.299
6	10.42	310.143	(M+H)+ = 289.1653; (M+Na)+ = 311.1457
7	10.56	242.155	(M+H)+ = 243.1589
8	11.36	471.241	(M+H)+ = 472.2433
9	11.48	486.324	(M+H)+ = 487.3275; (M+H)+[-H2O] = 469.3161
10	13.42	468.314	(M+H)+ = 468.3138
11	14.05	457.28	(M+H)+ = 458.2835
12	14.41	468.314	(M+H)+ = 469.3174; (M+H)+[-H2O] = 451.3057
13	14.75	344.224	(M+H)+ = 345.2274
14	16.42	412.286	(M+H)+ = 431.3008; (M+Na)+ = 453.2816

## Sheet: Table S6
Table S6: Composition of different production media used for secondary metabolites production by SAJ15
Production Media	Composition	References
PM01	10.0 g soluble starch, 2.0 g NH4SO4, 2.0 g CaCO3, 1.0 g NaCl, 1.0 g K2HPO4, and 1.0 g yeast extract in 1 L distilled water; pH 7.0	[1]
PM02	10.0 g soluble starch, 0.3 g casein, 2.0 g KNO3, 2.0 g NaCl, 2.0 g K2HPO4, 0.05 g MgSO4.7H2O, 0.02 g CaCO3 and 1.0 mL trace salt solution* in 1 L distilled water; pH 7.0	[2]
PM03	10.0 g soluble starch, 2.0 g yeast extract, 2.0 g CaCO3, 1.0 g NaCl, 1.0 g K2HPO4 and 1.0 mL trace salt solution* in 1 L distilled water; pH 7.0	[1]
PM04	10.0 g maltose, 2.9 g Na2HPO4, 2.3 g K2HPO4, 2.0 g NaCl, 0.05 g MgSO4 and 1.0 mL trace salt solution* in 1 L distilled water; pH 7.0	this study, modified from [3]
PM05	4.0 g glucose, 10.0 g malt extract, 4.0 g yeast extract and 1.0 mL trace salt solution* in 1 L distilled water; pH 7.2	[2]
*Trace salt solution contained 0.1 g FeSO4·7H2O, 0.1 g MnCl2·4H2O and 0.1 g ZnSO4·7H2O in 100 mL sterile distilled water.
	[1] Jose PA, Jebakumar SRD (2013) Diverse actinomycetes from Indian coastal solar salterns—a resource for antimicrobial screening. Journal of Pure and Applied Microbiology 7: 2569–2575
	[2] Kuster E, Williams ST (1964) Selection of media for isolation of Streptomycetes. Nature 202:928–929
	[3] Govindarajan G, Satheeja Santhi V, Jebakumar SR. (2014) Antimicrobial potential of phylogenetically unique actinomycete, Streptomyces sp. JRG-04 from marine origin. Biologicals. 42:305-11.
